# Supplementary material
Source: MDPI journal article supplement (https://www.mdpi.com/1999-4907/12/3/330)
Supplement: s1 [file s1]

Archive with 2 entries (2 files):
- Electronic Supplementary Material S1.pdf
- Electronic Supplementary Material S2.pdf
