# Supplementary material
Source: MDPI journal article supplement (https://www.mdpi.com/1999-4907/12/3/330)
Supplement: s1 [file s1]

## Electronic Supplementary Material S1

### Occurrence probability maps

#### **Content**

|                     |    |
|---------------------|----|
| RCP 8.5 predictions | 1  |
| Figure 1            | 1  |
| Figure 2            | 2  |
| Figure 3            | 3  |
| Figure 4            | 4  |
| Figure 5            | 5  |
| Figure 6            | 6  |
| Figure 7            | 7  |
| RCP 4.5 predictions | 8  |
| Figure 8            | 8  |
| Figure 9            | 9  |
| Figure 10           | 10 |
| Figure 11           | 11 |
| Figure 12           | 12 |
| Figure 13           | 13 |
| Figure 14           | 14 |

Sallmannshofer et al. (2021) Continent-wide tree species distribution models may mislead regional management decisions: a case study in the transboundary Biosphere Reserve Mura-Drava-Danube.

### RCP 8.5 predictions

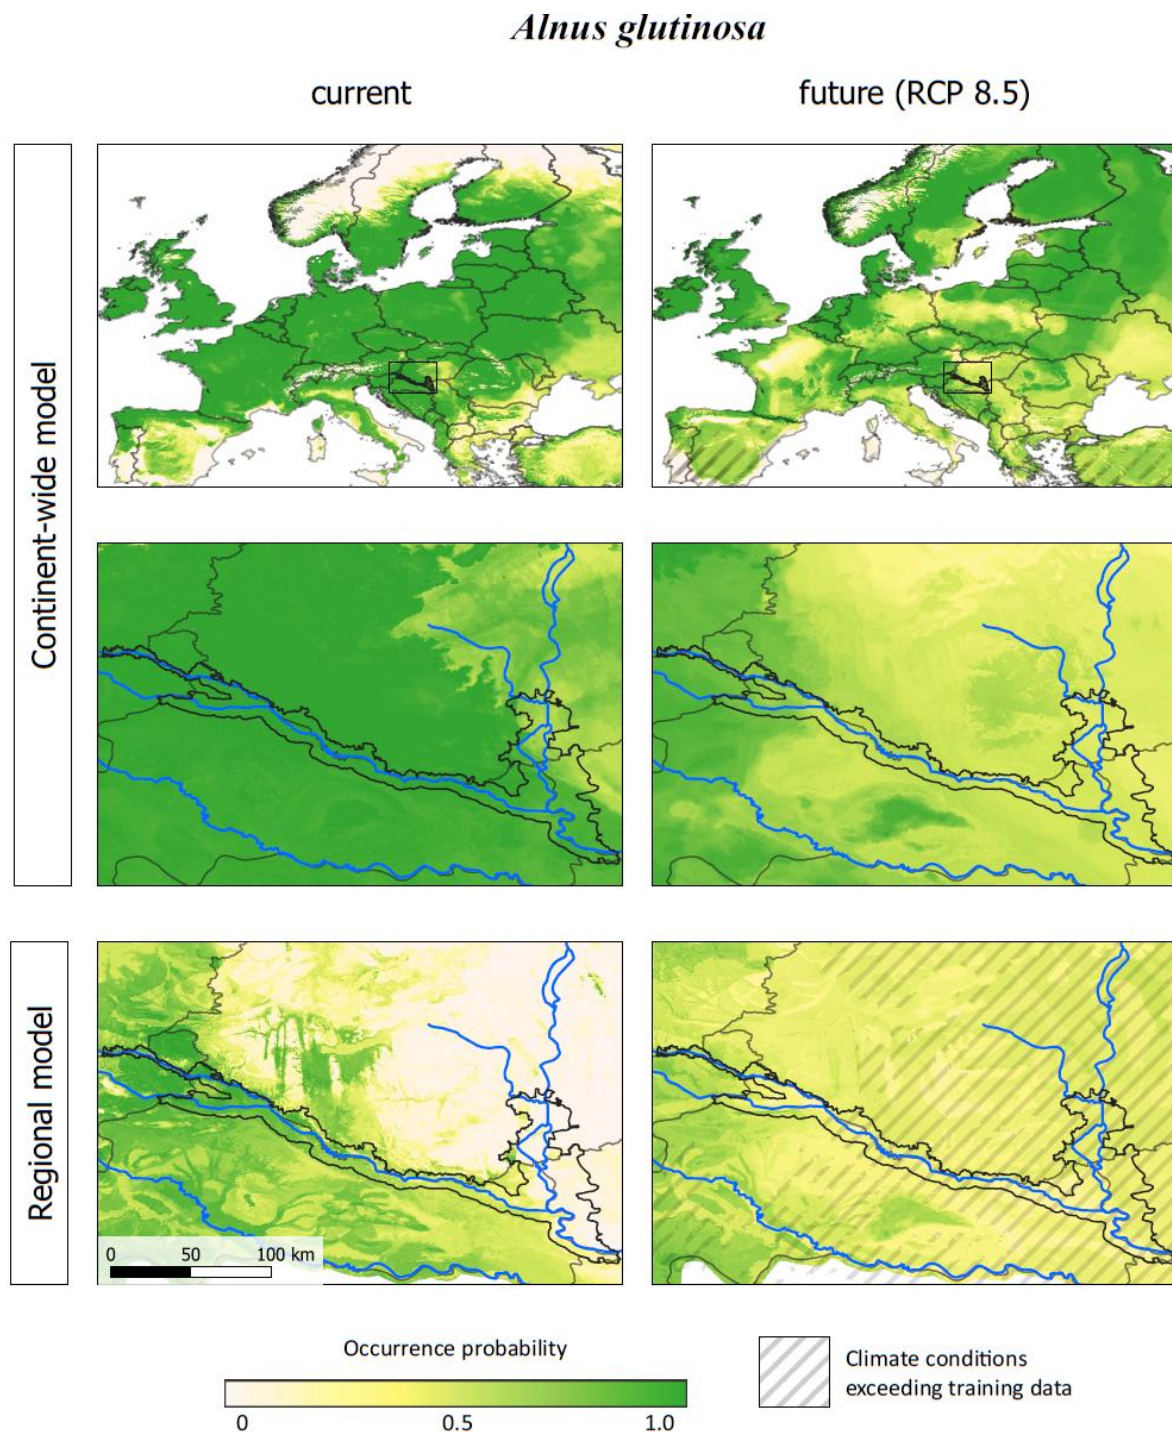

**Figure 1**

Current and future (RCP 8.5, 2081-2100) prediction maps for *Alnus glutinosa* of the continent-wide model (top and middle) and the regional model (down). The continent-wide models were trained with generalized occurrence and climate data only, while the regional models are based on precise occurrences and a larger environmental dataset comprising climate, river and soil variables. Bold black lines represent the delineation of the transboundary Biosphere Reserve Mura-Drava-Danube, blue lines major river systems, and thin grey lines country borders. Grey diagonal texture highlights areas with the future climate range exceeding the models' training data, indicating that further extrapolation of observed trends in occurrence amplitude could result in even stronger changes than displayed for these areas.

Sallmannshofer et al. (2021) Continent-wide tree species distribution models may mislead regional management decisions: a case study in the transboundary Biosphere Reserve Mura-Drava-Danube.

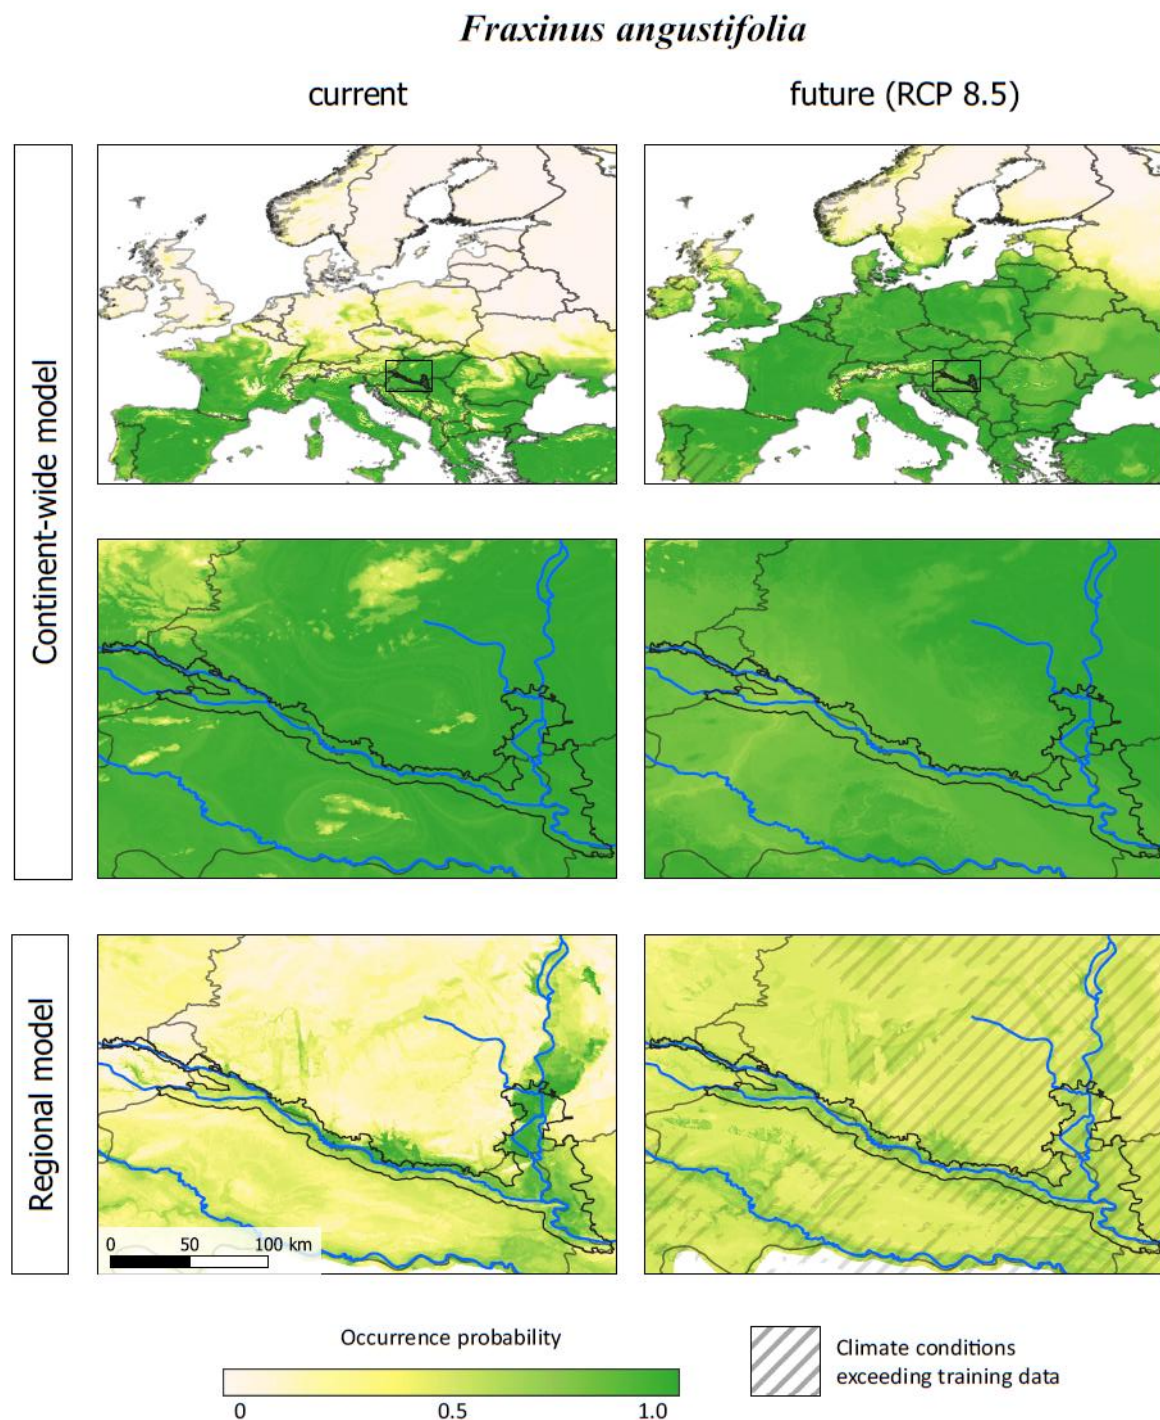

**Figure 2**

Current and future (RCP 8.5, 2081-2100) prediction maps for *Fraxinus angustifolia* of the continent-wide model (top and middle) and the regional model (down). The continent-wide models were trained with generalized occurrence and climate data only, while the regional models are based on precise occurrences and a larger environmental dataset comprising climate, river and soil variables. Bold black lines represent the delineation of the transboundary Biosphere Reserve Mura-Drava-Danube, blue lines major river systems, and thin grey lines country borders. Grey diagonal texture highlights areas with the future climate range exceeding the models' training data, indicating that further extrapolation of observed trends in occurrence amplitude could result in even stronger changes than displayed for these areas.



Sallmannshofer et al. (2021) Continent-wide tree species distribution models may mislead regional management decisions: a case study in the transboundary Biosphere Reserve Mura-Drava-Danube.

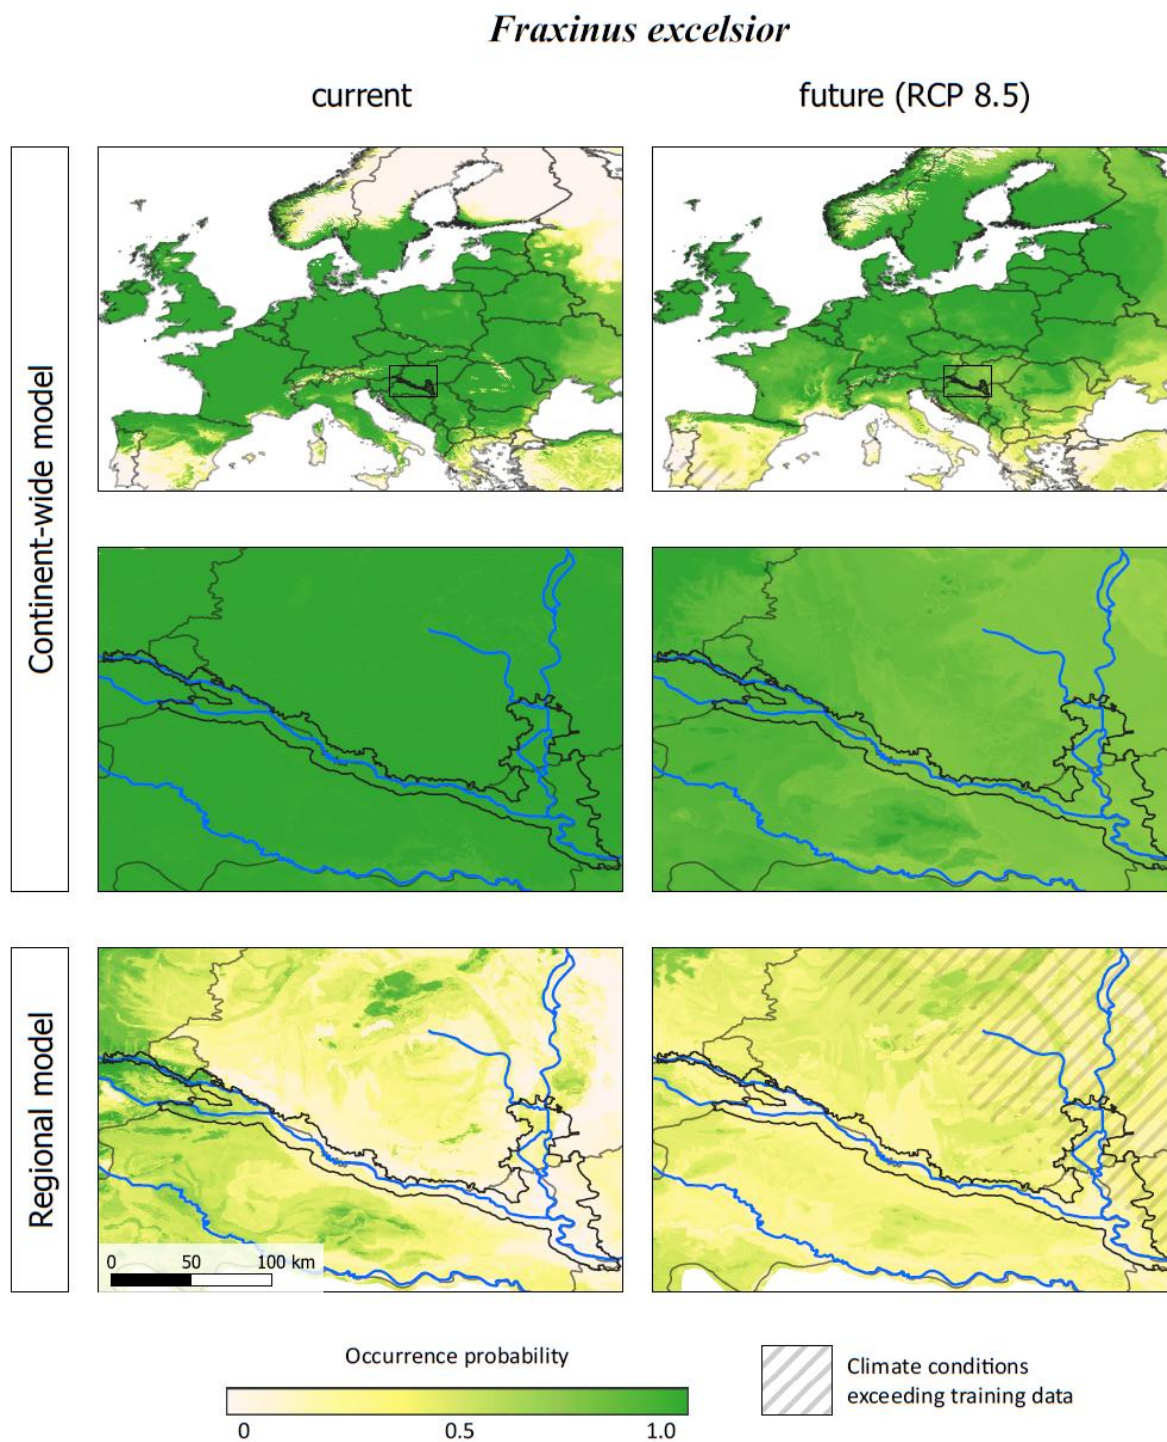

**Figure 3**

Current and future (RCP 8.5, 2081-2100) prediction maps for *Fraxinus excelsior* of the continent-wide model (top and middle) and the regional model (down). The continent-wide models were trained with generalized occurrence and climate data only, while the regional models are based on precise occurrences and a larger environmental dataset comprising climate, river and soil variables. Bold black lines represent the delineation of the transboundary Biosphere Reserve Mura-Drava-Danube, blue lines major river systems, and thin grey lines country borders. Grey diagonal texture highlights areas with the future climate range exceeding the models' training data, indicating that further extrapolation of observed trends in occurrence amplitude could result in even stronger changes than displayed for these areas.

Sallmannshofer et al. (2021) Continent-wide tree species distribution models may mislead regional management decisions: a case study in the transboundary Biosphere Reserve Mura-Drava-Danube.

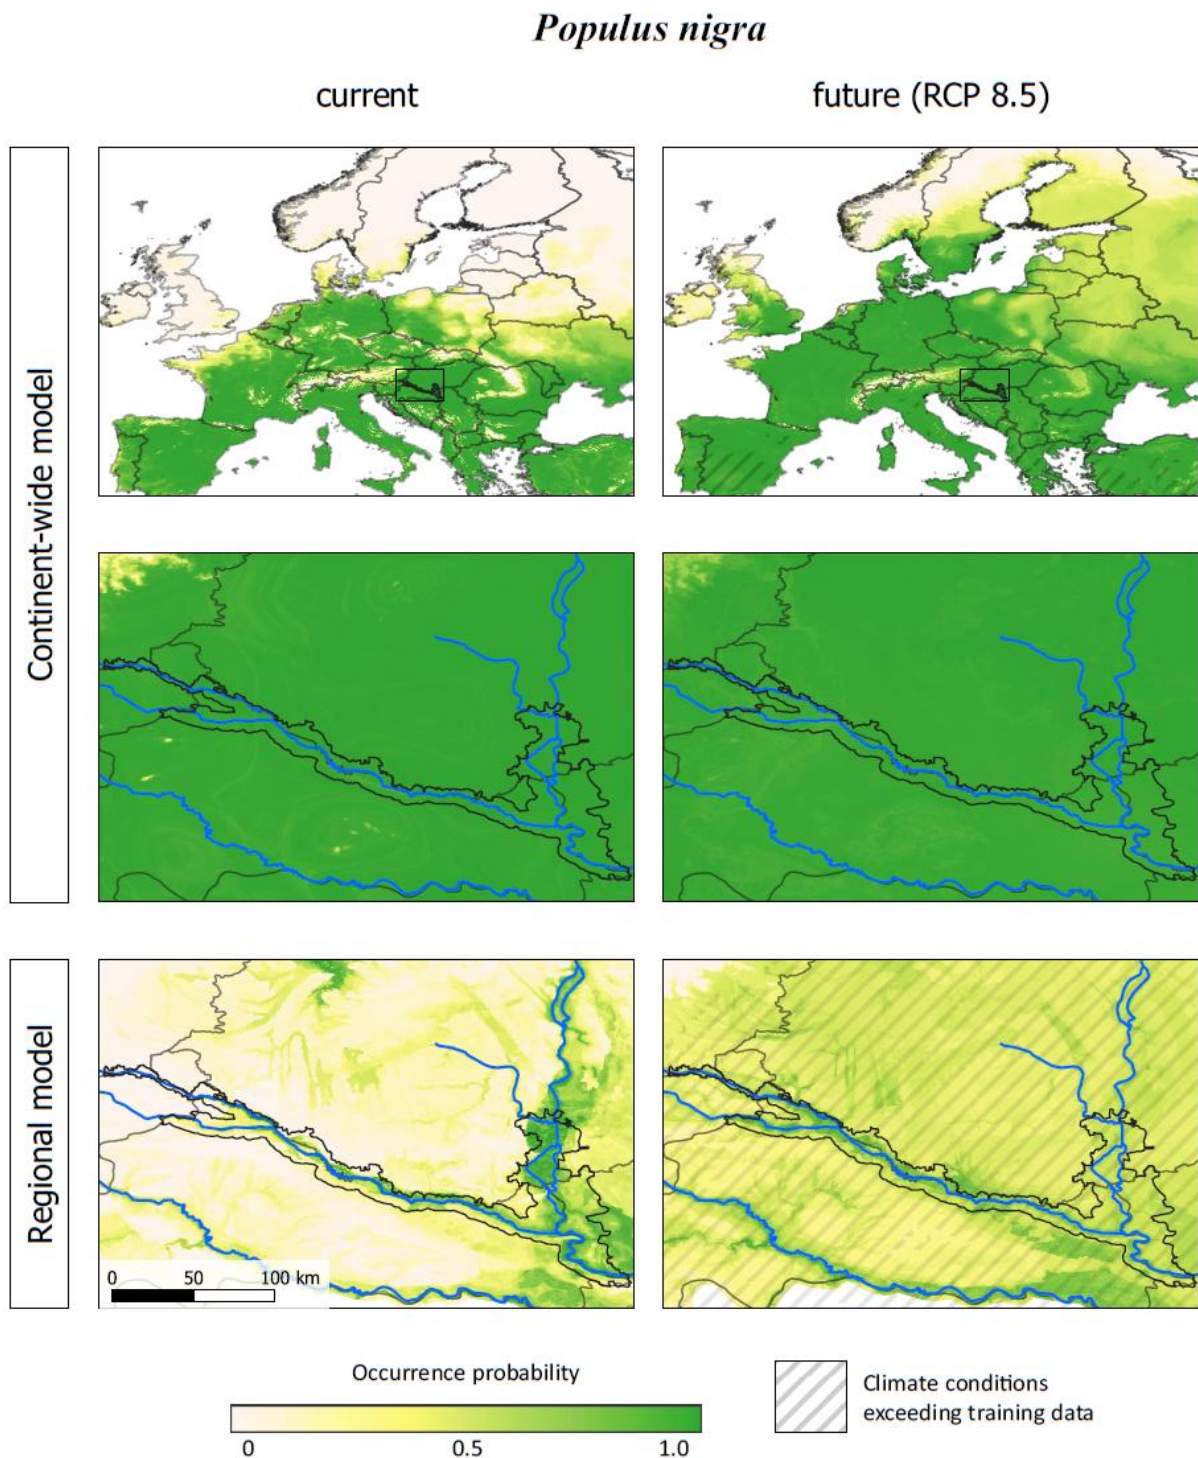

**Figure 4**

Current and future (RCP 8.5, 2081-2100) prediction maps for *Populus nigra* of the continent-wide model (top and middle) and the regional model (down). The continent-wide models were trained with generalized occurrence and climate data only, while the regional models are based on precise occurrences and a larger environmental dataset comprising climate, river and soil variables. Bold black lines represent the delineation of the transboundary Biosphere Reserve Mura-Drava-Danube, blue lines major river systems, and thin grey lines country borders. Grey diagonal texture highlights areas with the future climate range exceeding the models' training data, indicating that further extrapolation of observed trends in occurrence amplitude could result in even stronger changes than displayed for these areas.



Sallmannshofer et al. (2021) Continent-wide tree species distribution models may mislead regional management decisions: a case study in the transboundary Biosphere Reserve Mura-Drava-Danube.

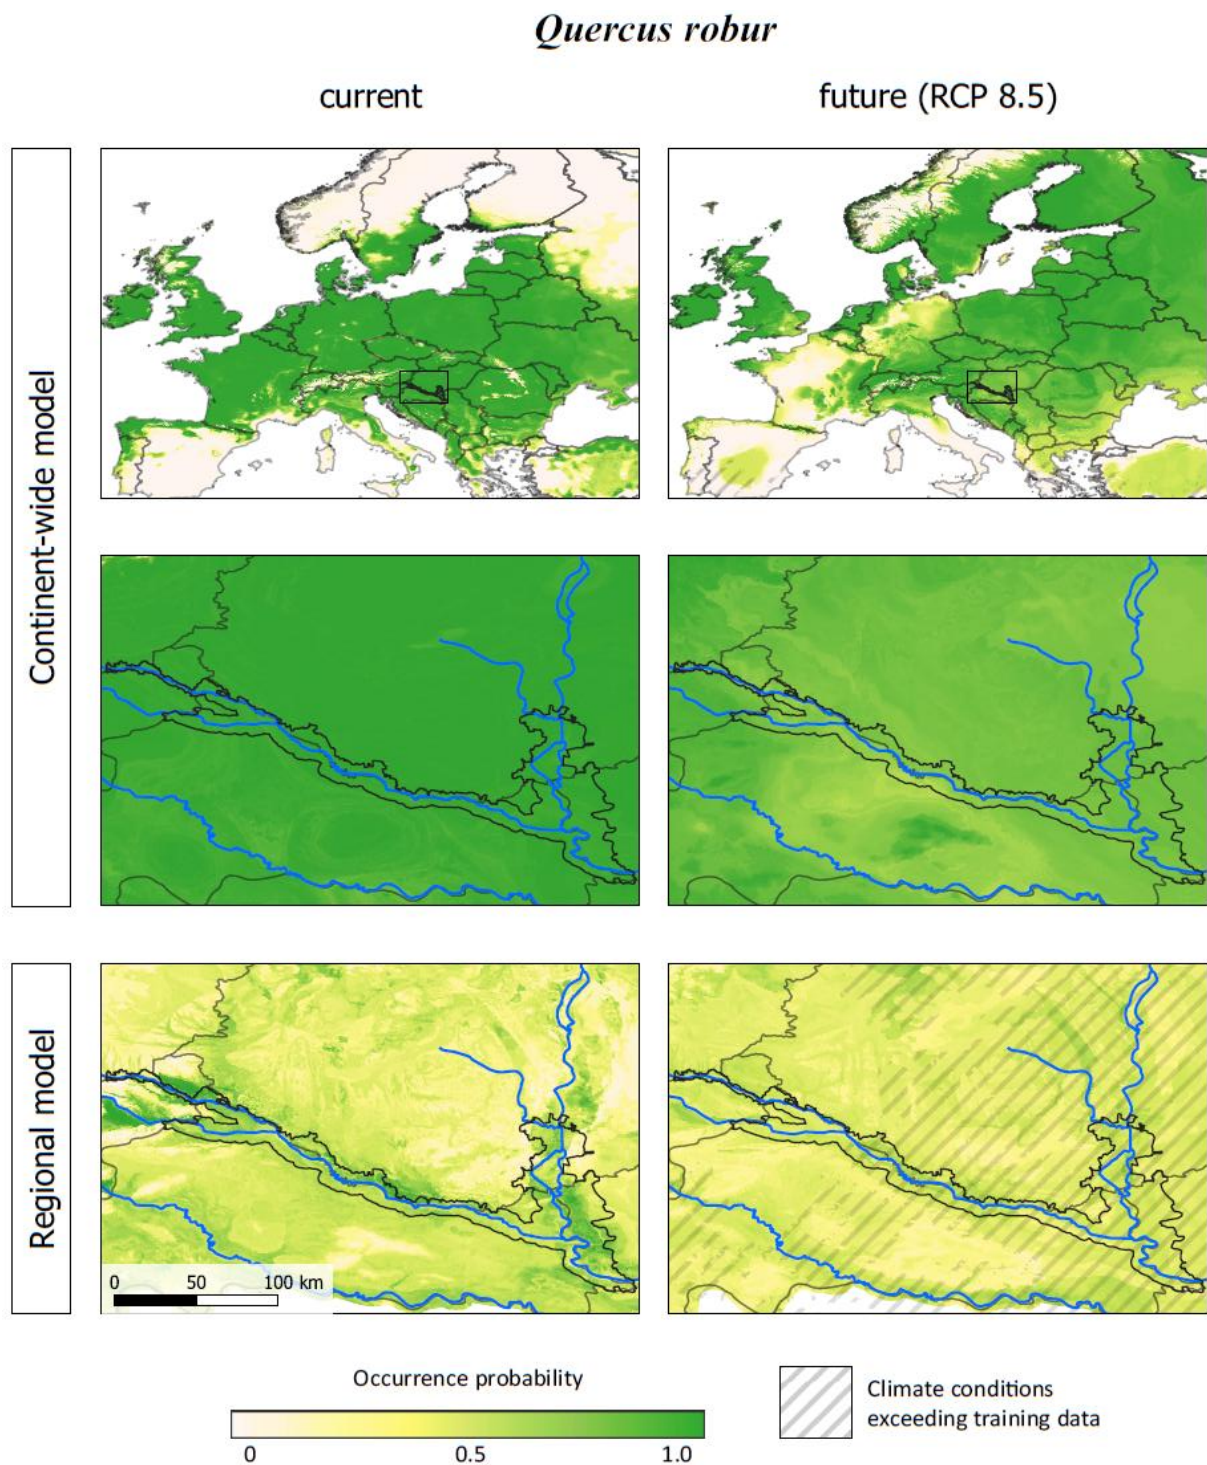

**Figure 5**

Current and future (RCP 8.5, 2081-2100) prediction maps for *Quercus robur* of the continent-wide model (top and middle) and the regional models (down). The continent-wide models were trained with generalized occurrence and climate data only, while the regional models are based on precise occurrences and a larger environmental dataset comprising climate, river and soil variables. Bold black lines represent the delineation of the transboundary Biosphere Reserve Mura-Drava-Danube, blue lines major river systems, and thin grey lines country borders. Grey diagonal texture highlights areas with the future climate range exceeding the models' training data, indicating that further extrapolation of observed trends in occurrence amplitude could result in even stronger changes than displayed for these areas.

Sallmannshofer et al. (2021) Continent-wide tree species distribution models may mislead regional management decisions: a case study in the transboundary Biosphere Reserve Mura-Drava-Danube.

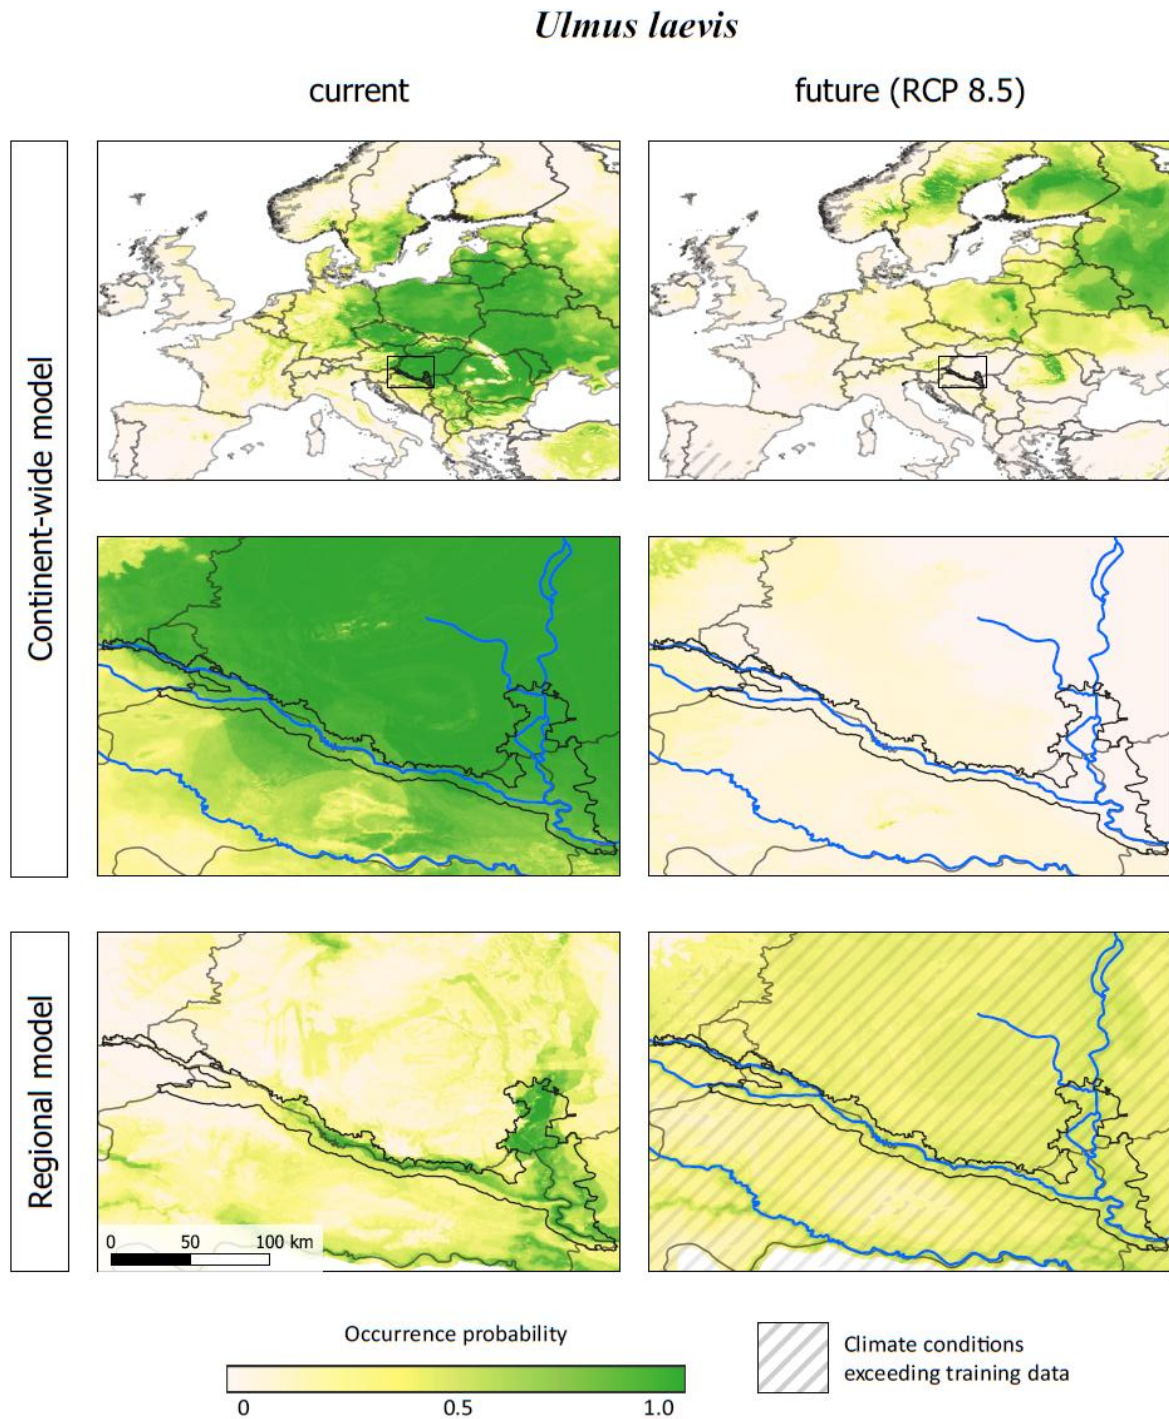

**Figure 6**

Current and future (RCP 8.5, 2081-2100) prediction maps for *Ulmus laevis* of the continent-wide model (top and middle) and the regional model (down). The continent-wide models were trained with generalized occurrence and climate data only, while the regional models are based on precise occurrences and a larger environmental dataset comprising climate, river and soil variables. Bold black lines represent the delineation of the transboundary Biosphere Reserve Mura-Drava-Danube, blue lines major river systems, and thin grey lines country borders. Grey diagonal texture highlights areas with the future climate range exceeding the models' training data, indicating that further extrapolation of observed trends in occurrence amplitude could result in even stronger changes than displayed for these areas.



Sallmannshofer et al. (2021) Continent-wide tree species distribution models may mislead regional management decisions: a case study in the transboundary Biosphere Reserve Mura-Drava-Danube.

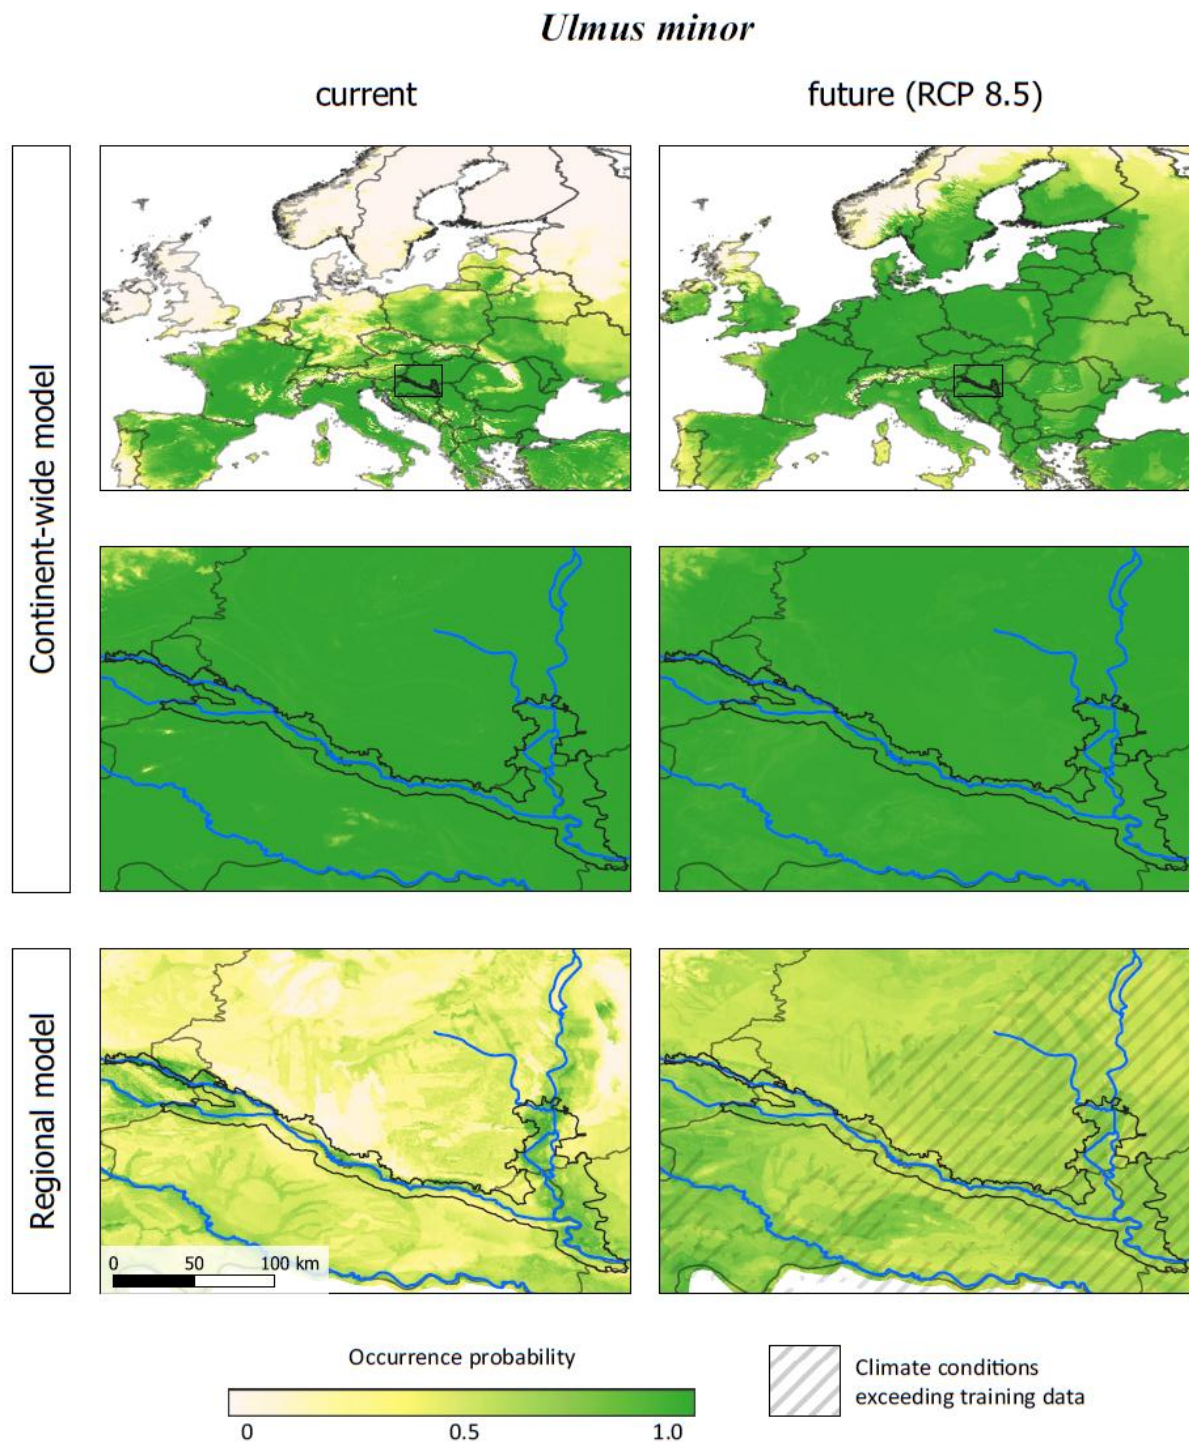

**Figure 7**

Current and future (RCP 8.5, 2081-2100) prediction maps for *Ulmus minor* of the continent-wide model (top and middle) and the regional model (down). The continent-wide models were trained with generalized occurrence and climate data only, while the regional models are based on precise occurrences and a larger environmental dataset comprising climate, river and soil variables. Bold black lines represent the delineation of the transboundary Biosphere Reserve Mura-Drava-Danube, blue lines major river systems, and thin grey lines country borders. Grey diagonal texture highlights areas with the future climate range exceeding the models' training data, indicating that further extrapolation of observed trends in occurrence amplitude could result in even stronger changes than displayed for these areas.



Sallmannshofer et al. (2021) Continent-wide tree species distribution models may mislead regional management decisions: a case study in the transboundary Biosphere Reserve Mura-Drava-Danube.

### RCP 4.5 predictions

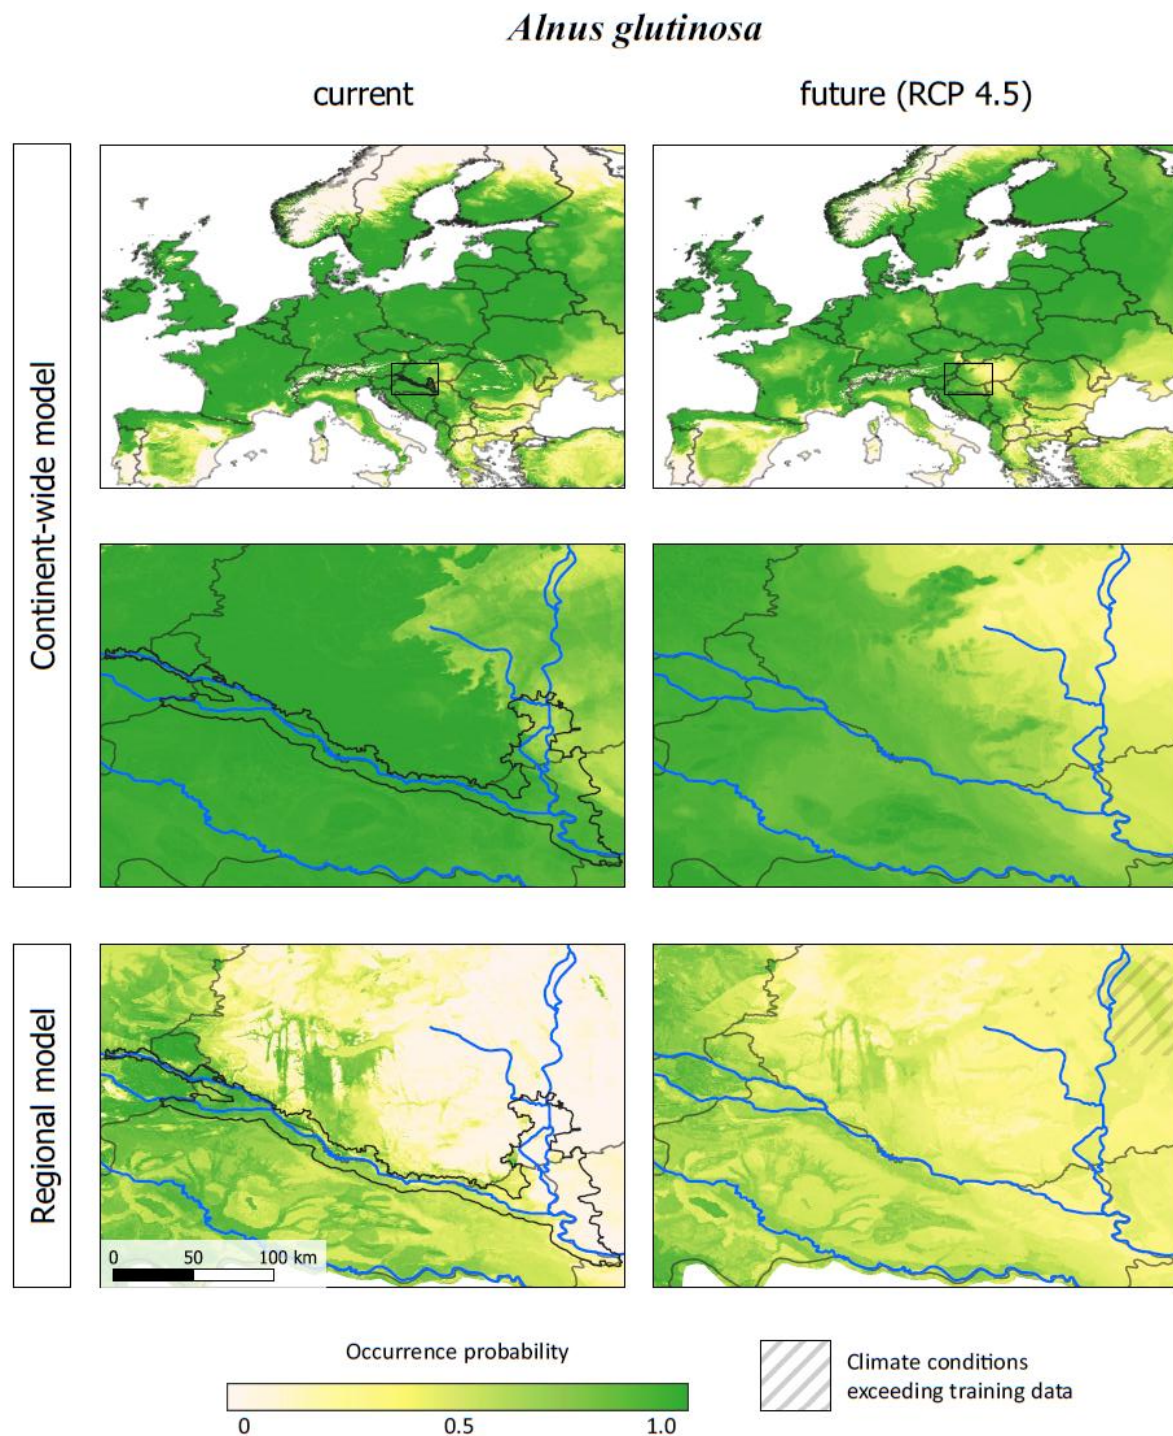

**Figure 8**

Current and future (RCP 4.5, 2081-2100) prediction maps for *Alnus glutinosa* of the continent-wide model (top and middle) and the regional model (down). The continent-wide models were trained with generalized occurrence and climate data only, while the regional models are based on precise occurrences and a larger environmental dataset comprising climate, river and soil variables. Bold black lines represent the delineation of the transboundary Biosphere Reserve Mura-Drava-Danube, blue lines major river systems, and thin grey lines country borders. Grey diagonal texture highlights areas with the future climate range exceeding the models' training data, indicating that further extrapolation of observed trends in occurrence amplitude could result in even stronger changes than displayed for these areas.

Sallmannshofer et al. (2021) Continent-wide tree species distribution models may mislead regional management decisions: a case study in the transboundary Biosphere Reserve Mura-Drava-Danube.

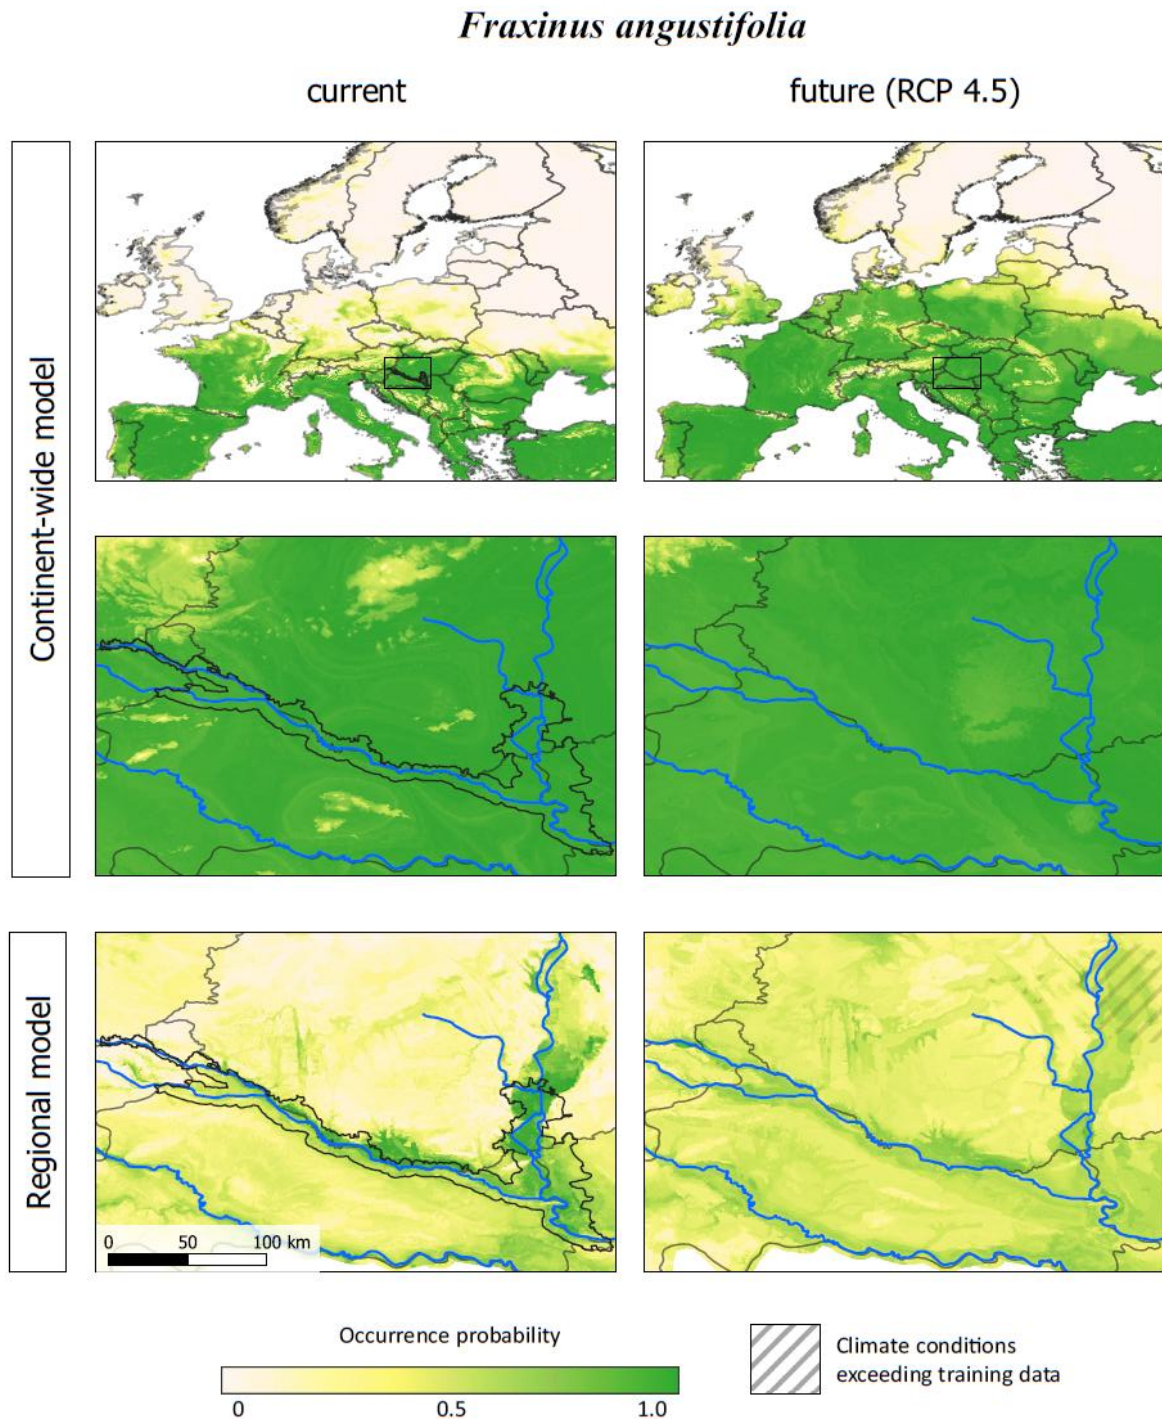

**Figure 9**

Current and future (RCP 4.5, 2081-2100) prediction maps for *Fraxinus angustifolia* of the continent-wide model (top and middle) and the regional model (down). The continent-wide models were trained with generalized occurrence and climate data only, while the regional models are based on precise occurrences and a larger environmental dataset comprising climate, river and soil variables. Bold black lines represent the delineation of the transboundary Biosphere Reserve Mura-Drava-Danube, blue lines major river systems, and thin grey lines country borders. Grey diagonal texture highlights areas with the future climate range exceeding the models' training data, indicating that further extrapolation of observed trends in occurrence amplitude could result in even stronger changes than displayed for these areas.



Sallmannshofer et al. (2021) Continent-wide tree species distribution models may mislead regional management decisions: a case study in the transboundary Biosphere Reserve Mura-Drava-Danube.

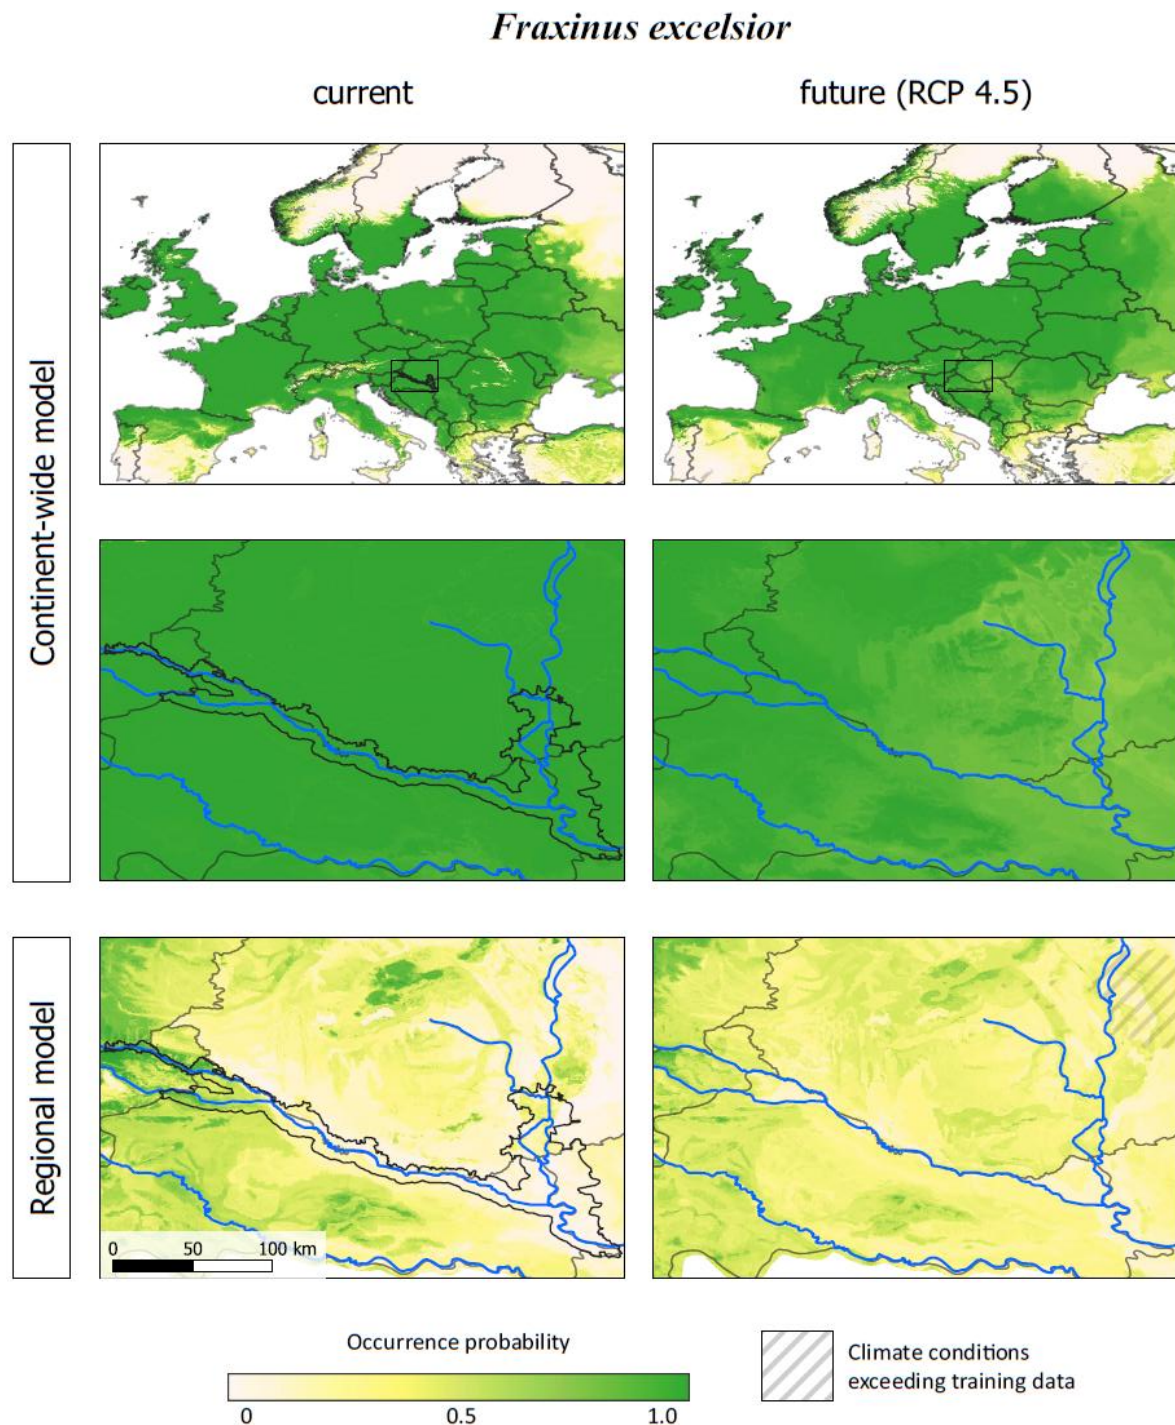

**Figure 10**

Current and future (RCP 4.5, 2081-2100) prediction maps for *Fraxinus excelsior* of the continent-wide model (top and middle) and the regional model (down). The continent-wide models were trained with generalized occurrence and climate data only, while the regional models are based on precise occurrences and a larger environmental dataset comprising climate, river and soil variables. Bold black lines represent the delineation of the transboundary Biosphere Reserve Mura-Drava-Danube, blue lines major river systems, and thin grey lines country borders. Grey diagonal texture highlights areas with the future climate range exceeding the models' training data, indicating that further extrapolation of observed trends in occurrence amplitude could result in even stronger changes than displayed for these areas.

Sallmannshofer et al. (2021) Continent-wide tree species distribution models may mislead regional management decisions: a case study in the transboundary Biosphere Reserve Mura-Drava-Danube.

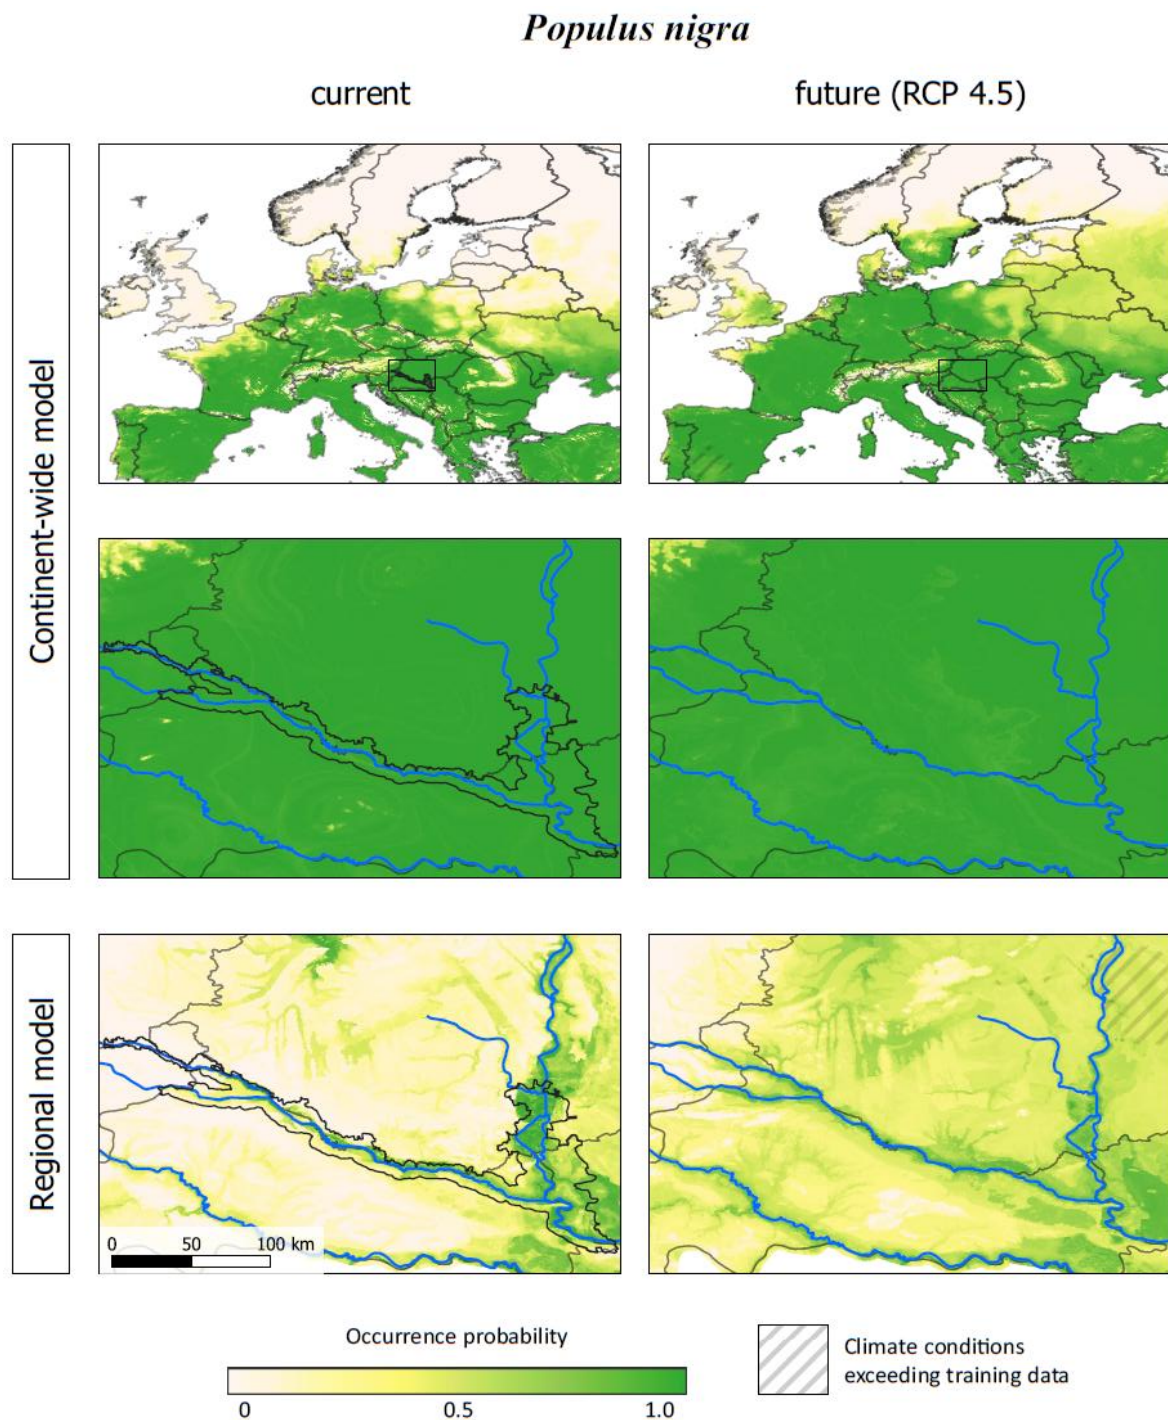

**Figure 11**

Current and future (RCP 4.5, 2081-2100) prediction maps for *Populus nigra* of the continent-wide model (top and middle) and the regional model (down). The continent-wide models were trained with generalized occurrence and climate data only, while the regional models are based on precise occurrences and a larger environmental dataset comprising climate, river and soil variables. Bold black lines represent the delineation of the transboundary Biosphere Reserve Mura-Drava-Danube, blue lines major river systems, and thin grey lines country borders. Grey diagonal texture highlights areas with the future climate range exceeding the models' training data, indicating that further extrapolation of observed trends in occurrence amplitude could result in even stronger changes than displayed for these areas.



Sallmannshofer et al. (2021) Continent-wide tree species distribution models may mislead regional management decisions: a case study in the transboundary Biosphere Reserve Mura-Drava-Danube.

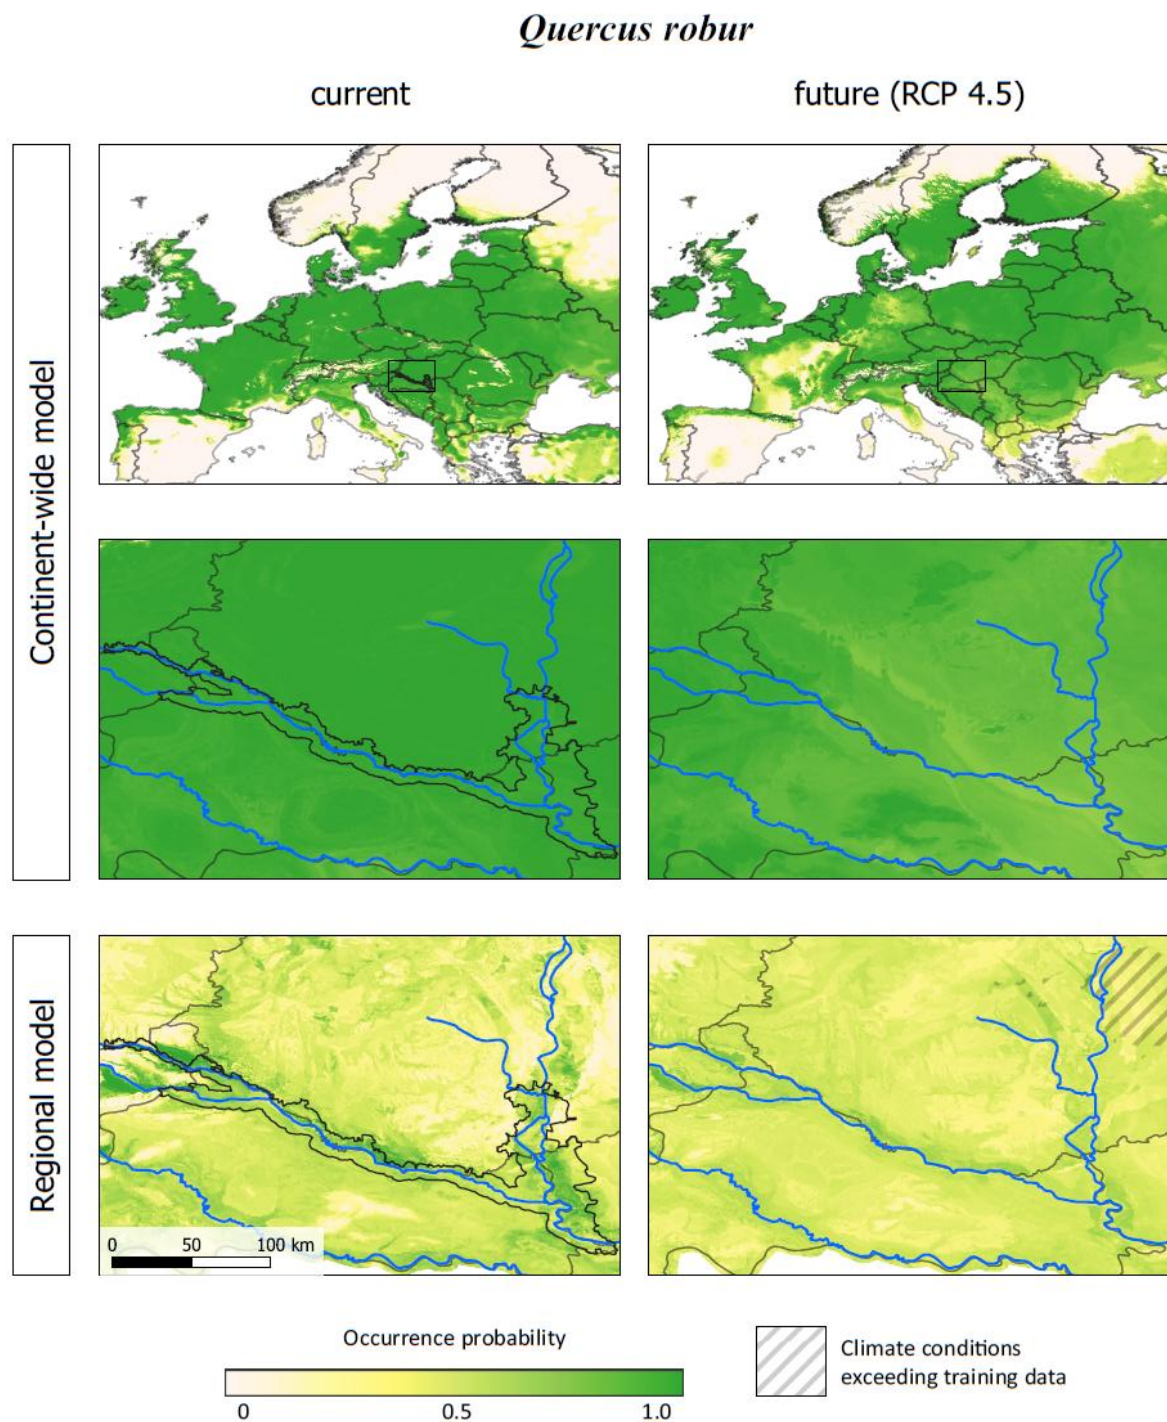

**Figure 12**

Current and future (RCP 4.5, 2081-2100) prediction maps for *Quercus robur* of the continent-wide model (top and middle) and the regional model (down). The continent-wide models were trained with generalized occurrence and climate data only, while the regional models are based on precise occurrences and a larger environmental dataset comprising climate, river and soil variables. Bold black lines represent the delineation of the transboundary Biosphere Reserve Mura-Drava-Danube, blue lines major river systems, and thin grey lines country borders. Grey diagonal texture highlights areas with the future climate range exceeding the models' training data, indicating that further extrapolation of observed trends in occurrence amplitude could result in even stronger changes than displayed for these areas.

Sallmannshofer et al. (2021) Continent-wide tree species distribution models may mislead regional management decisions: a case study in the transboundary Biosphere Reserve Mura-Drava-Danube.

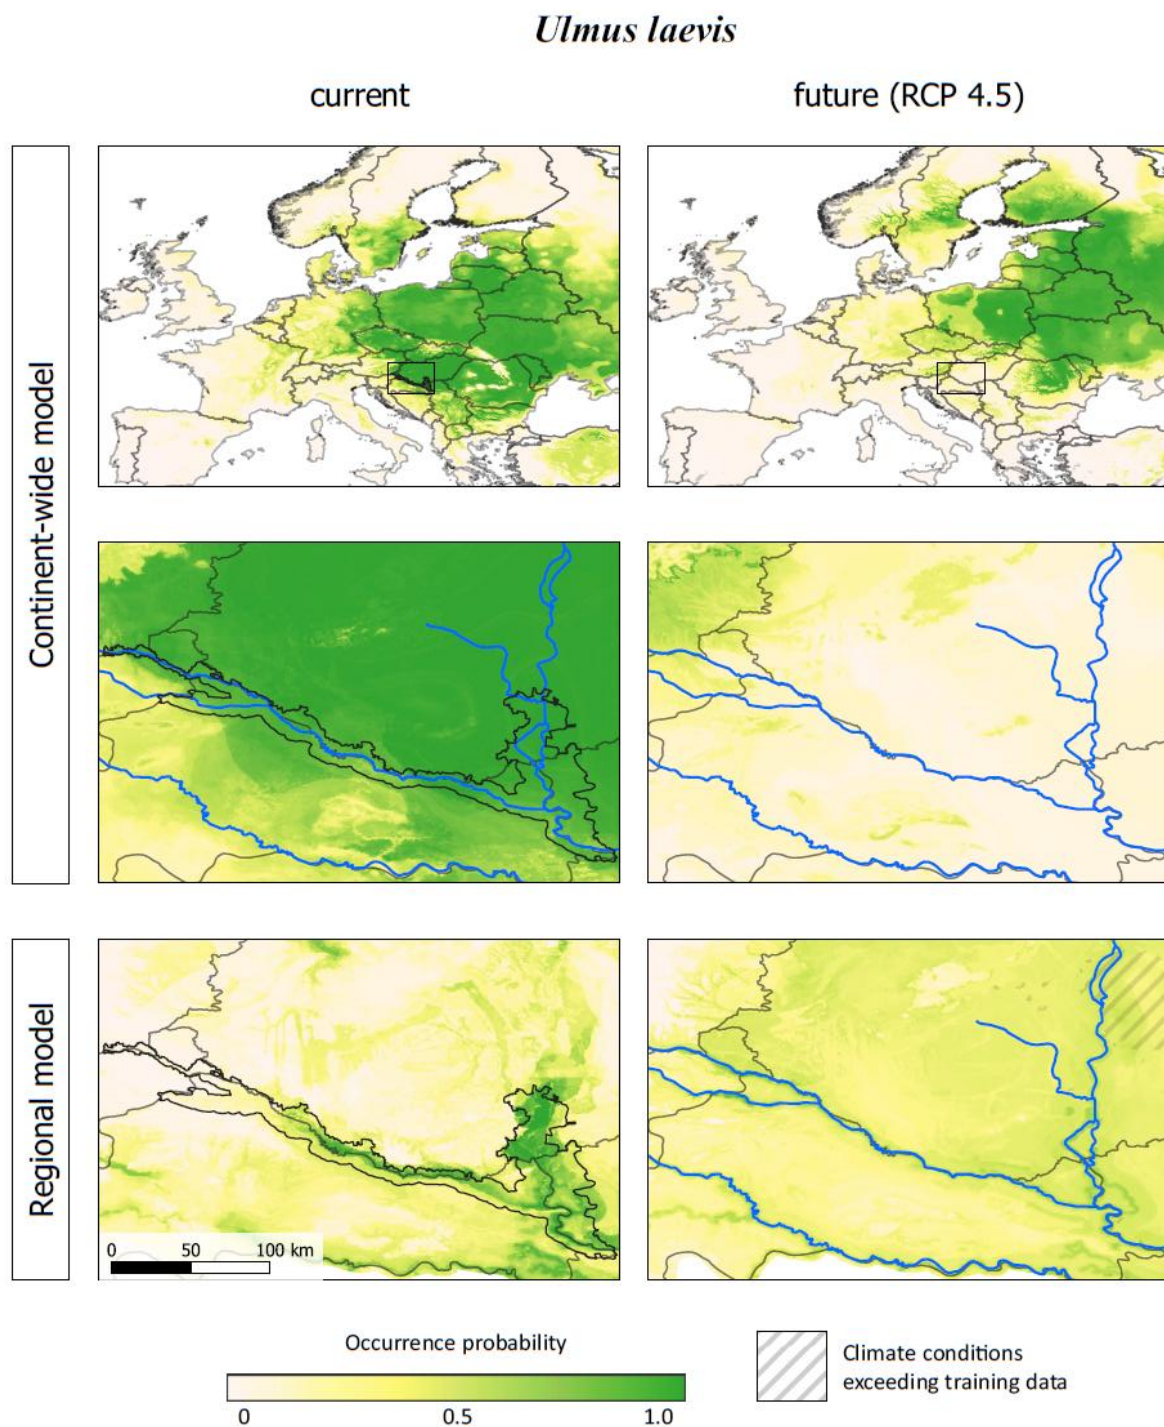

**Figure 13**

Current and future (RCP 4.5, 2081-2100) prediction maps for *Ulmus laevis* of the continent-wide model (top and middle) and the regional model (down). The continent-wide models were trained with generalized occurrence and climate data only, while the regional models are based on precise occurrences and a larger environmental dataset comprising climate, river and soil variables. Bold black lines represent the delineation of the transboundary Biosphere Reserve Mura-Drava-Danube, blue lines major river systems, and thin grey lines country borders. Grey diagonal texture highlights areas with the future climate range exceeding the models' training data, indicating that further extrapolation of observed trends in occurrence amplitude could result in even stronger changes than displayed for these areas.



Sallmannshofer et al. (2021) Continent-wide tree species distribution models may mislead regional management decisions: a case study in the transboundary Biosphere Reserve Mura-Drava-Danube.

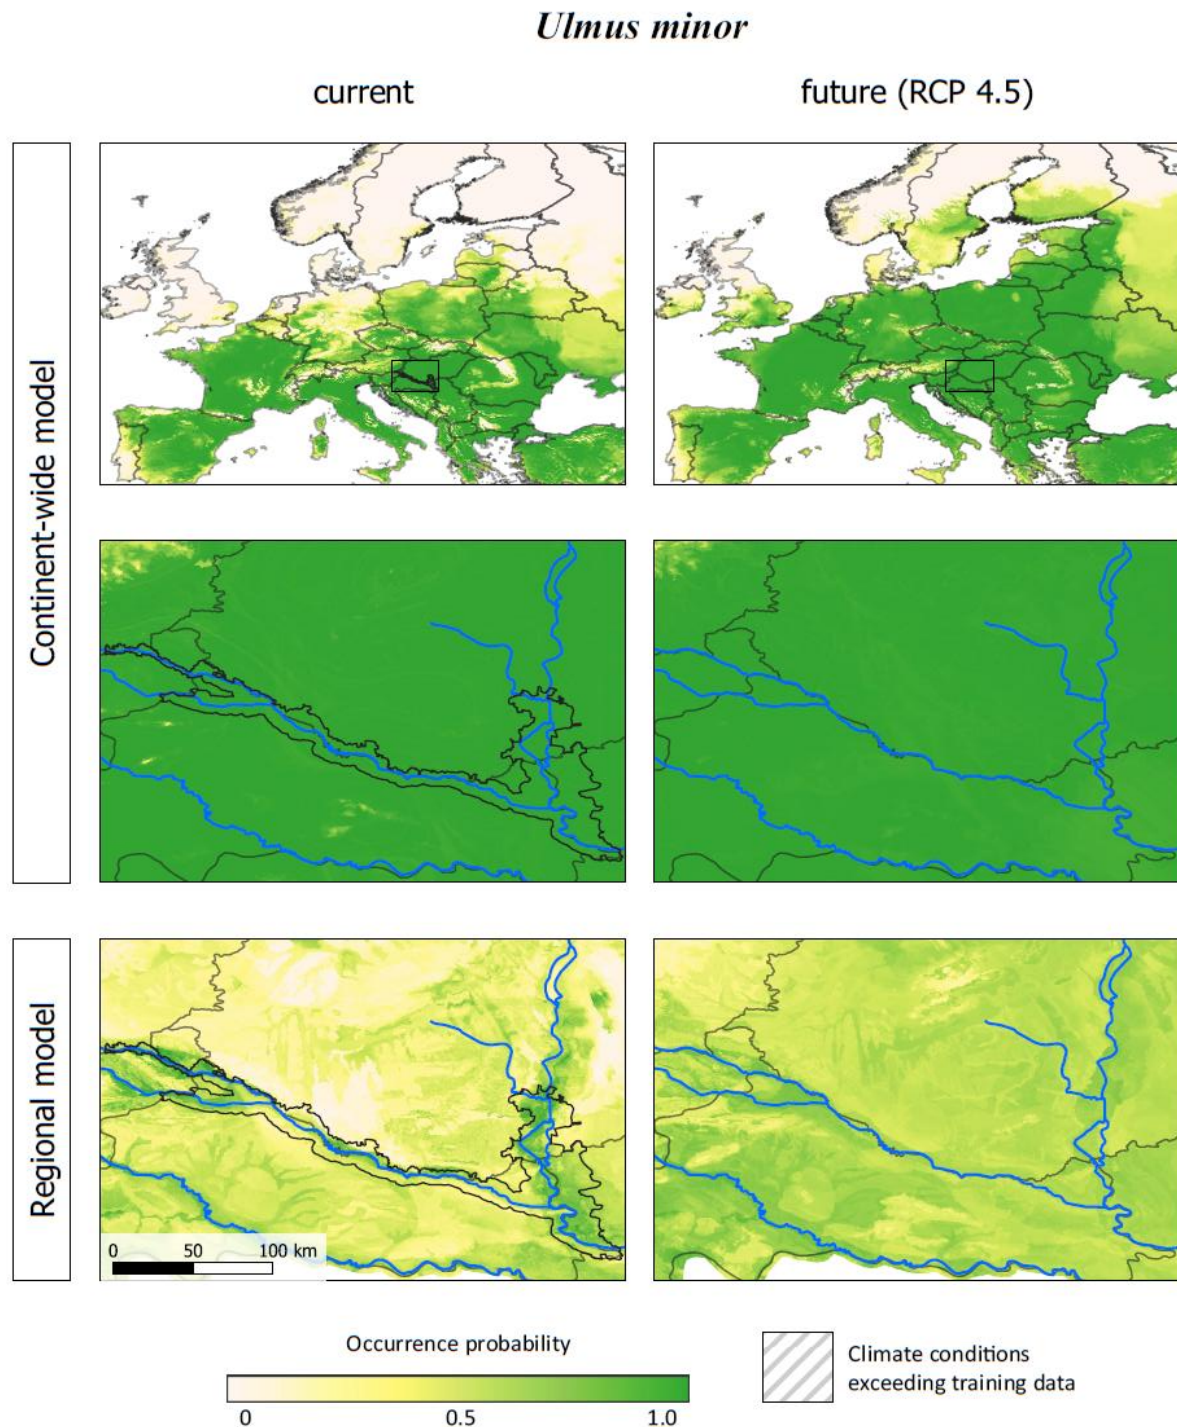

**Figure 14**

Current and future (RCP 4.5, 2081-2100) prediction maps for *Ulmus minor* of the continent-wide model (top and middle) and the regional model (down). The continent-wide models were trained with generalized occurrence and climate data only, while the regional models are based on precise occurrences and a larger environmental dataset comprising climate, river and soil variables. Bold black lines represent the delineation of the transboundary Biosphere Reserve Mura-Drava-Danube, blue lines major river systems, and thin grey lines country borders. Grey diagonal texture highlights areas with the future climate range exceeding the models' training data, indicating that further extrapolation of observed trends in occurrence amplitude could result in even stronger changes than displayed for these areas.
